# Supplementary material for: International perspectives on physician knowledge, attitudes, and practices related to medical cannabis
Source: Frontiers journal article supplement (doi:10.3389/fpubh.2025.1463871), 2025-02-20
Supplement: Data_Sheet_1.pdf [file Data_Sheet_1.pdf]

## International Medical Cannabis Survey

Q1

Choose the region of the world that you live in:

Choose country

If you are in  
USA,  
choose state

Q2

Please enter your National Provider Identification (NPI) number (if you are in USA) OR the national Medical Council registration number of your country to authenticate that you are a physician. By entering your NPI or Medical council registration number you are also indicating your consent to participate in this survey.

Q3

Enter the words or numbers that you see in the textbo below:

Q4

If you are unable to access the survey, or want to access this survey in another language please send an email to: [rajiv.radhakrishnan@yale.edu](mailto:rajiv.radhakrishnan@yale.edu)

Q5

Please tell us a little about yourself

- Year of birth
- Gender (M/F)
- What state/states/region do you practice in
- Year of graduating residency/ completing medical training (or expected year)
- Is medical use of marijuana legalized in the state/region that you practice in? (Yes/ No/ Don't know)

Q6

Please tell us about your training and current practice.

- Specialty of residency training
- Sub-specialty training
- Practice Setting

Q7

How would you best characterize your practice?

- Primarily In-patient
- Primarily Out-patient

Q8

Approximately what percentage of patients you see belong to the following categories?

0 10 20 30 40 50 60 70 80 90 100

Children  
and  
adolesce  
nts

Adults

Geriatrics

Q9

Approximately what percentage of patients that you see in your practice have one or more the following diagnosis?

0 10 20 30 40 50 60 70 80 90 100

Pain syndromes

Terminal  
Cancer/  
Terminal  
illness

Epilepsy

Multiple  
sclerosis

Alzheimer's  
disease

Tourette  
syndrome

Substan  
ce  
dependen  
ce/  
Addiction

Depression,  
mania and  
other mood  
disorders

Schizophrenia

Post-  
Traumatic  
Stress

Disorder  
Sickle cell  
disease  
Crohn's  
disease  
Psoriasis  
Hepatitis C

Arthritis

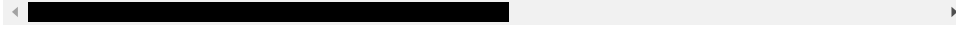

Q10

Please indicate your proficiency in treating the following conditions (2 stars= novice; 3 stars= moderate proficiency; 5 stars= expert)

Pain syndromes

Terminal illness/ cancer

Epilepsy

Multiple Sclerosis

Alzheimer's Disease

Tourette's syndrome

Substance  
abuse/addiction

Depression,  
mania and  
other mood  
disorders

Schizophrenia

Post-traumatic Stress  
Disorder

Sickle-cell disease

Crohn's disease

Psoriasis

Hepatitis C

Arthritis

Q11

If you have received requests from patients for "medical-marijuana"

How many requests to you get on average in a month?

What percent of the patients you see request "medical marijuana"

The 1st most common reason for request of "medical marijuana" is:

The 2nd most common reason for request of "medical marijuana" is:

The 3rd most common reason for request of "medical marijuana" is:

Q12

What has your experience with prescribing "medical marijuana" been?

I frequently prescribe/authorize

"medical marijuana" I refer patients

who need "medical marijuana"

I've never prescribed/authorized "medical marijuana" but I'm open to the idea

I've never prescribed/authorized "medical marijuana" and I never will

I don't know enough about "medical marijuana" to make a decision

Q13

Recognizing that the decision to prescribe a medication is highly dependent on the patient and their specific and unique circumstances, how willing are you to prescribe/authorize/recommend "medical marijuana" in the following case vignettes? In all of these cases, the patient has approached you asking for a medical marijuana recommendation. Choose a percentage between (0%- Definitely no, 50%- Neither likely nor unlikely, 100%- Definitely yes; Skip question - not my specialty).

0 10 20 30 40 50 60 70 80 90 100

1. 35y/o  
male veteran  
with post-  
traumatic  
stress  
disorder (PTSD).

2. 70-year-  
old man with  
diabetes  
and chronic  
neuropathic  
pain  
refractory to  
gabapentin.

3. 29y/o  
woman with  
HIV/AIDS  
complaining  
of low  
appetite,  
significant weight  
loss and cachexia.

4. 44  
year-old  
woman with  
opioid abuse  
(prescribed  
for non-  
specific pain)  
presenting  
with "anxiety  
attacks."



5. 55-year  
old woman  
with severe  
nausea/vomiti  
ng  
undergoing  
chemotherap  
y for acute  
myelogen  
ous  
leukem  
ia.

6. 54-year-  
old man  
with  
severe  
rheumat  
oid  
arthritis

Q14

Recognizing that the decision to prescribe a medication is highly dependent on the patient and their specific and unique circumstances, how willing are you to prescribe/authorize/recommend "medical marijuana" in the following case vignettes? In all of these cases, the patient has approached you asking for a medical marijuana recommendation. Choose a percentage between (0%- Definitely no, 50%- Neither likely nor unlikely, 100%- Definitely yes; Skip question - not my specialty).

0 10 20 30 40 50 60 70 80 90 100

7. 15  
year-old  
male with  
severe  
Sickle cell disease.

8. 8-year-  
old girl with  
severe  
autism and  
behavioral  
problems,  
self- injurious  
behavior  
and  
agitation.

9. 67-year-  
old man  
with history  
of  
moderate-  
severe  
Parkinson's  
disease.

10. 32-  
year-old  
woman  
with no  
medical  
history  
presenting  
with  
insomnia.

11. 85 year  
old man  
with  
Alzheimer'  
s disease/  
Lewy body  
dementia  
with  
extreme  
sensitivity  
to  
antipsychotics who  
has  
uncontrolled  
episodic  
agitation.

12. 13 year  
old girl with  
severe  
uncontrolled  
tics  
secondary to  
Tourette's  
disease.

13. 24 year  
old male with  
epilepsy not  
controlled  
with  
3 anti-epileptics.

---

Q15

Recognizing that the decision to prescribe a medication is highly dependent on the patient and their specific and unique circumstances, how willing are you to prescribe/authorize/recommend "medical marijuana" in the following case vignettes? In all of these cases, the patient has approached you asking for a medical marijuana recommendation. Choose a percentage between (0%- Definitely no, 50%- Neither likely nor unlikely, 100%- Definitely yes; Skip question - not my specialty).

0 10 20 30 40 50 60 70 80 90 100

14. 23 year  
old female  
with severe  
remitting-  
relapsing  
Multiple  
Sclerosis with  
recent onset  
of optic  
neuritis

15. 56 year  
old man with  
history of  
alcohol  
abuse,  
hepatitis C,  
recently  
diagnosed  
with cirrhosis

16. 36 year  
old man with  
Amyotropic  
Lateral  
Sclerosis with  
severe  
spasticity

17. 28 year  
old man  
with severe  
psoriasis  
without  
psoriatic  
arthritis

18. 48 year  
old female  
with severe,  
refractory  
glaucoma

19. 31 year  
old man with  
severe  
spasticity  
secondary  
to Multiple  
Sclerosis

20. 36 year  
old male with  
chronic,  
refractory  
Crohn's  
Disease.

Q16

Approximately what percentage of patients that you see in your practice have the following diagnosis?

0 10 20 30 40 50 60 70 80 90 100

Cannabis-  
induced  
psychosis

Synthetic  
cannabinoid-  
induced  
psychosis  
(Spice/K2)

Bath-  
salt  
(cathinone)-  
induced  
psychosis

Alcohol-  
induced  
psychosis

Exacerbation of pre-  
existing  
psychiatric  
disorder  
due to  
cannabis  
use

Exacerbati  
on of  
medical  
disorder due  
to cannabis  
use

Q17

Approximately what percent of people who try marijuana  
(just once) develop addiction or  
use disorder?

<1%

5%

10%

>20%

Q18

Without using an internet search, can you name the qualifying conditions for "medical  
marijuana" according to the laws in your State (choose all that apply)

Post-traumatic Stress Disorder

HIV/

AIDS

Glauco

ma

Cancer

Neuropathic

pain Chronic

low back pain

Epilepsy

Schizophrenia

Non-specific nausea/vomiting

Cluster headache

Amyotropic Lateral Sclerosis (ALS or Lou

Gehrig's disease) Crohn's disease

Juvenile Rheumatoid Arthritis

Alzheimer's

disease

Multiple

Sclerosis

Hepatitis C

Psoriasis

Fabry's

disease

Sickle cell

disease

Severe spasticity secondary to neurological cause

None of the above/ Does not apply to my country/region



Q19

Approximately what percent of people who use marijuana daily are or will become addicted?

<1%

10-15%

25-50%

>50%

Q20

In your opinion, are there reasons to prescribe medical marijuana rather than dronabinol (delta-9-tetrahydrocannabinol), which is approved by Food and Drug Administration, European Medicines Agency or equivalent national regulatory agency? (If yes, list up to 5 reasons, one in each line)

Q21

Do you believe there is a link between cannabis use and psychosis?

Yes, I've seen cases that exemplify the association

Yes, I believe the research studies

No, the link between cannabis use and psychosis is an artifact

No, I've never seen a cases of psychosis among my patients who smoke a lot of cannabis

No, I don't believe the research studies

Q22

Hypothetically, if you had a condition that qualified for "medical marijuana" would you opt to get a prescription for yourself?

Yes

No
